# Supplementary material for: Role of Flavonoids in Sepsis: Advances and Future Prospects
Source: Preprints.org preprint supplement (doi:10.20944/preprints202405.1306.v1), 2024-05-20
Supplement: Supplementary file 1 [file supplementary]

**Responses to Reviewer’s comments (Round 2)**

**Comment 1:** Edit abstract to mention what are you talking about in the article. There is no mention of flavonoids in the abstract. When a reader reads the abstract they should instantly know what is in the article

**Response 1:** the word “flavonoids” is added in the abstract

**Comment 2:** Move table 1 close to the section 1.1 and add table reference in The text

**Response 2:** figure 1 is moved to the previous section, and figure reference is added in section 1.1

**Comment 3:** Proofread before submission

**Response 3:** the draft is checked
